# Supplementary material
Source: PubMed Central journal article supplement (PMC3401420)
Supplement: NIHMS331937-supplement-01.pdf [file NIHMS331937-supplement-01.pdf]

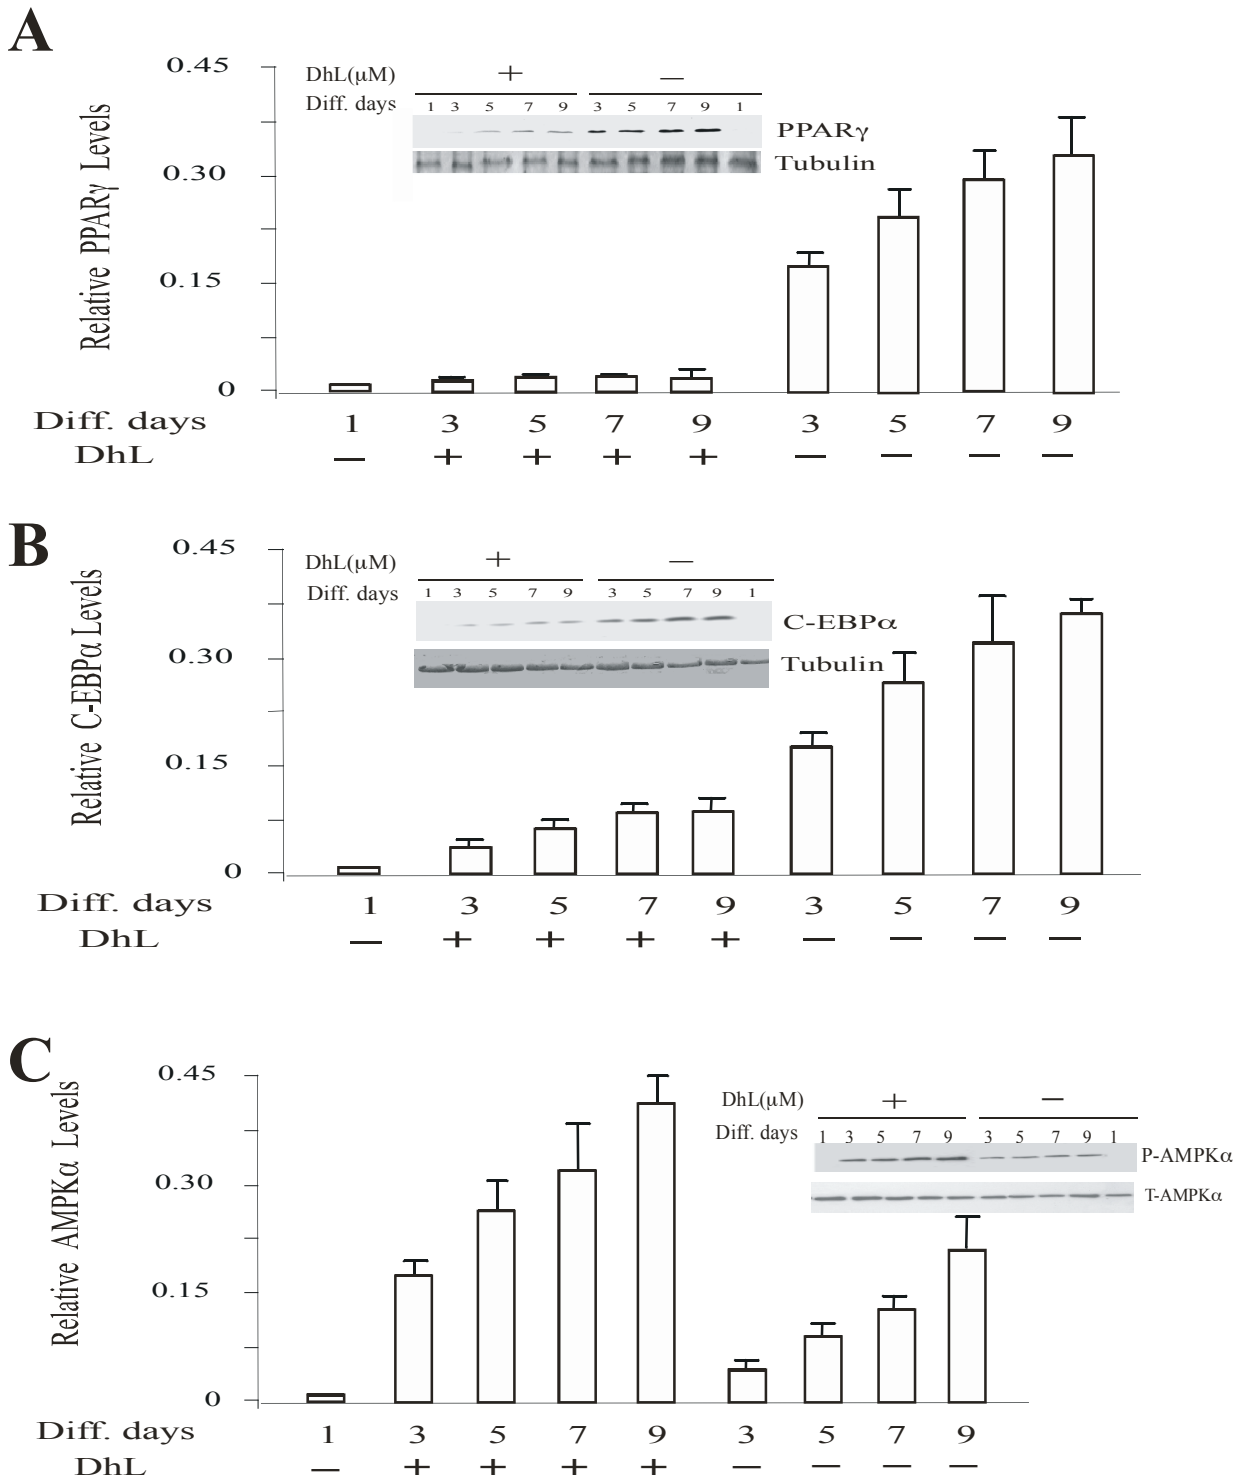

**Supplementary Fig. 3. Dehydroleucodine selectively alters the expression of PPAR $\gamma$ , C-EBP $\alpha$  and AMPK $\alpha$ .** 3T3-L1 preadipocytes were induced to differentiate by induction media into adipocytes in the absence (insert: -DhL, control) or in the presence (insert: +DhL) of 8  $\mu$ M DhL. Total protein extracts were prepared at day 1, 3, 5, 7 and 9 from each sample. The proteins were subset to 12% SDS-PAGE electrophoresis, blotted to a nitrocellulose membrane, and probed with anti-bodies specific to PPAR $\gamma$ , C-EBP $\alpha$ , AMPK $\alpha$  and tubulin. Relative levels of proteins were determined by densitometry as describe in Material and Methods. Data represent the mean  $\pm$  S.E.M. of three independent experiments.
